# Supplementary material for: Relationship between Dietary Habits, Food Attitudes and Food Security Status among Adults Living within the United States Three Months Post-Mandated Quarantine: A Cross-Sectional Study
Source: PubMed Central journal article supplement (PMC7697798; doi:10.3390/nu12113468), 2020-11-12
Supplement: nutrients-12-03468-s001.pdf [file nutrients-12-03468-s001.pdf]

**File S1:** Survey on U.S. Adults’ Dietary habits, Food Attitudes and Food security status during COVID-19

**1. Dietary Habits.** For the following foods listed, indicate if the amount you have consumed has increased, decreased or remained the same since COVID-19

| Food Category/ Item                                                                            | Increased | Decreased | No change |
|------------------------------------------------------------------------------------------------|-----------|-----------|-----------|
| Milk and non-milk alternatives, yogurt and cheese                                              |           |           |           |
| Margarine or butter                                                                            |           |           |           |
| Fruit (fresh, frozen or canned)                                                                |           |           |           |
| Fruit juice                                                                                    |           |           |           |
| Non-starchy vegetables such as broccoli, carrots, green beans (fresh, frozen or canned), salad |           |           |           |
| Vegetable or tomato juice                                                                      |           |           |           |
| Eggs, chicken, turkey                                                                          |           |           |           |
| Beef, pork or lamb                                                                             |           |           |           |
| Processed meats such as bacon, hot dogs, sausage, salami, bologna or luncheon meats            |           |           |           |
| Fish and shellfish                                                                             |           |           |           |
| Cold breakfast cereal                                                                          |           |           |           |
| White bread including pita bread                                                               |           |           |           |
| Dark bread including pita bread                                                                |           |           |           |
| French fried potatoes                                                                          |           |           |           |
| Starchy vegetables such as corn, peas, and beans                                               |           |           |           |
| White rice or pasta                                                                            |           |           |           |
| Brown rice or whole-grain pasta                                                                |           |           |           |
| Potato chips or other salty snacks such as crackers                                            |           |           |           |
| Nuts or seeds                                                                                  |           |           |           |
| Peanut butter or other nut butter spreads                                                      |           |           |           |
| Sweets – candy, cake, cookies, pies                                                            |           |           |           |
| Oil such as olive, sunflower                                                                   |           |           |           |
| Water                                                                                          |           |           |           |
| Coffee or tea                                                                                  |           |           |           |
| Immune enhancing beverages – such as ginger, curcumin                                          |           |           |           |
| Beer or wine                                                                                   |           |           |           |
| Hard liquor – such as whiskey, rum, vodka, gin                                                 |           |           |           |
| Low calorie carbonated beverages such as diet colas                                            |           |           |           |
| Carbonated beverages with sugar such as colas, lemonade, fruit drinks                          |           |           |           |

2. **Food Attitudes.** Since COVID-19, indicate if your attitudes towards eating have changed for the following statements:

|                                                                                       | Increased | Decreased | No change |
|---------------------------------------------------------------------------------------|-----------|-----------|-----------|
| I find that when I start eating certain foods, I end up eating much more than planned |           |           |           |
| I find myself continuing to consume certain foods even though I am no longer hungry   |           |           |           |
| I eat to the point where I feel physically ill                                        |           |           |           |
| I spend a lot of time feeling sluggish or fatigued from overeating                    |           |           |           |
| I find myself constantly eating certain foods throughout the day                      |           |           |           |
| My behavior with respect to food and eating causes significant distress.              |           |           |           |

**Health Characteristics and Anthropometrics.**

3. What is your current height in feet and inches? For example, 5 feet 8 inches
4. What is your current weight in pounds?
5. Since COVID-19, has your weight:
  - a. Increased
  - b. Decreased
  - c. No change
6. Which of the following conditions do you have? (select all that apply)
  - a. Cancer
  - b. Dementia / Alzheimer’s
  - c. Depression
  - d. Diabetes (high blood sugar)
  - e. Diverticulosis/Diverticulitis
  - f. Gastric reflux
  - g. Heart disease (includes high blood pressure, heart attack, artery disease, stroke, angina)
  - h. Irritable Bowel
  - i. Liver disease (cirrhosis, fatty liver)
  - j. Lung disease
  - k. Nausea/Vomiting
  - l. Other (please indicate) \_\_\_\_\_
  - m. None of the above
7. Since COVID-19, have you tried a diet?
  - a. Yes
  - b. No

8. If yes, which of the following diets have you tried/currently on:
- Low carbohydrate diet
  - Low fat diet
  - Low salt diet
  - Plant-based diet
  - Weight management diet
  - Other:
9. Since COVID-19, have you begun taking nutritional supplements?
- Yes
  - No
10. If yes, which of the following nutritional supplements are you currently taking?
- Calcium
  - Magnesium
  - Multi-vitamin
  - Iron
  - Omega 3
  - Omega 6
  - Protein (bars, shakes, powder)
  - Vitamin B complex
  - Vitamin C
  - Vitamin D
  - Other:

11. **Lifestyle Habits.** For the following 8 statements, indicate which activities have increased, decreased, or no change since COVID-19:

|                                                                       | Increased | Decreased | No change |
|-----------------------------------------------------------------------|-----------|-----------|-----------|
| Eating                                                                |           |           |           |
| Exercising (Pilates, yoga, Running, walking or other cardio activity) |           |           |           |
| Physical activity (chores, gardening)                                 |           |           |           |
| Reading/Studying                                                      |           |           |           |
| Sleep hours and quality                                               |           |           |           |
| Smoking (Cigarettes, Cigar, Hookah)                                   |           |           |           |
| Socialization                                                         |           |           |           |
| Use of electronic devices                                             |           |           |           |

**Food Security.** For the following 6 statements, click the best answer since COVID-19:

12. The food that (I/we) bought just didn't last, and (I/we) didn't have money to get more
  - a. Often true
  - b. Sometimes true
  - c. Never true
  - d. Don't know or Refused to answer
  
13. (I/we) couldn't afford to eat balanced meals.
  - a. Often true
  - b. Sometimes true
  - c. Never true
  - d. Don't know or Refused to answer
  
14. Did (you/or other adults in your household) ever cut the size of your meals or skip meals because there wasn't enough money for food?
  - a. Yes
  - b. No
  - c. Don't know
  
15. How often since COVID-19, has this happen?
  - a. The past 2 months
  - b. The past month
  - c. Only once
  - d. Don't know
  
16. Since COVID-19, did you ever eat less than you felt you should because there wasn't enough money for food?
  - a. Yes
  - b. No
  - c. Don't Know
  
17. Since COVID-19, were you every hungry but didn't eat because there wasn't enough money for food?
  - a. Yes
  - b. No
  - c. Don't Know

**Demographics.** Please respond to the following demographic questions.

18. Since COVID-19, you are currently staying at home:
  - a. 25% or less
  - b. 50-75%
  - c. 75% -95%
  - d. Never have left my house
  
19. What is your age range?
  - a. 18-24 years old
  - b. 25-29 years old
  - c. 30-49 years old
  - d. 50-59 years old
  - e. 60-69 years old
  - f. 70 years old or older
  
20. What is your sex?
  - a. Male
  - b. Female
  - c. Other
  
21. What is your race/ethnicity?
  - a. African American
  - b. Asian
  - c. Caucasian
  - d. Hispanic
  - e. Native American
  - f. Other: \_\_\_\_\_
  
22. What region of the United States do you reside for at least 8 months of the year?
  - a. New England (Connecticut, Maine, Massachusetts, Rhode Island, Vermont)
  - b. Mid-Atlantic (New Jersey, New York, Pennsylvania)
  - c. South Atlantic (Delaware, Florida, Georgia, Maryland, North Carolina, South Carolina, Virginia, Washington DC, West Virginia)
  - d. East North Central (Illinois, Indiana, Michigan, Ohio, Wisconsin)
  - e. East South Central (Alabama, Kentucky, Mississippi, Tennessee)
  - f. West North Central (Iowa, Kansas, Minnesota, Missouri, Nebraska, North Dakota, South Dakota)
  - g. West South Central (Arkansas, Louisiana, Texas)
  - h. Mountain (Arizona, Colorado, Idaho, Montana, Nevada, New Mexico, Utah, Wyoming)
  - i. Pacific (Alaska, California, Hawaii, Oregon, Washington)
  
23. Besides yourself, how many people live in the household?

24. What is your education level?
- a. No schooling completed
  - b. Nursery school to 8th grade
  - c. Some high school, no diploma
  - d. High school graduate, diploma or the equivalent (for example: GED)
  - e. Some college credit, no degree
  - f. Trade/technical/vocational training
  - g. Associate degree
  - h. Bachelor's degree
  - i. Master's degree
  - j. Professional degree
  - k. Doctorate degree
25. What is your current employment status?
- a. Full-time
  - b. Part-time
  - c. Unemployed
  - d. Other
26. What is your marital status?
- a. Married
  - b. Single
  - c. Widowed
  - d. Divorced
  - e. Other
